# Supplementary material
Source: Research Square preprint supplement (doi:10.21203/rs.3.rs-9742111/v1)
Supplement: Supplementary file 1 [file c4aeb5eb9aa6348c378459c8.docx]

**Supplementary Information**

**Waterborne Toxicity of a Flame Retardant, Triphenyl Phosphate in the Presence of a Disposable Face Mask Released Plastic Microfibers in Marine Diatom *Chaetoceros* sp., and its Effects on Dietary Exposure to Marine Crustacean *Artemia salina***

Neethudas B Ya,b, Camil Rex Ma, P.K. Sureshb, and Amitava Mukherjeea*

*a Centre for Nanobiotechnology, VIT University, Vellore, Tamil Nadu, India*

*b School of Biosciences and Technology, VIT University, Vellore, Tamil Nadu, India*

*** Corresponding Author**

Amitava Mukherjee

Senior Professor and Director

Centre for Nanobiotechnology

Vellore Institute of Technology, Vellore 632014, India

Email: [amitav@vit.ac.in, amit.mookerjea@gmail.com](mailto:amitav@vit.ac.in,%20amit.mookerjea@gmail.com)

**Tables**

**Table S1. Composition of Artificial Sea Water per 1000 ml**

| **Chemicals** | **Grams** |
| --- | --- |
| Sodium Chloride | 26.29 |
| Potassium chloride | 0.74 |
| Calcium chloride | 0.99 |
| Magnesium chloride | 6.09 |
| Magnesium sulphate heptahydrate | 3.94 |

**Table S2. Accumulation of ThP in Artemia salina after dietary exposure to diatom**

**pretreated with pristine ThP and the binary mixture with MFs.**

| **Test groups** | **Accumulation of ThP**  **(mg/g - wet weight)** |
| --- | --- |
| 0.25mg/L ThP | 0.004 ± 0.0001 |
| 0.25mg/L ThP+0.25 mg MFs | BDL |
| 0.25mg/L ThP+1 mg MFs | BDL |
| 0.5mg/L ThP | 0.009 ± 0.0006 |
| 0.5mg/L ThP+0.25 mg MFs | BDL |
| 0.5mg/L ThP+0.25 mg MFs | BDL |
| 1mg/L ThP | 0.013 ± 0.0028 |
| 1mg/L ThP+0.25 mg MFs | BDL |
| 1mg/L ThP+0.25 mg MFs | BDL |

**Fig. S1**


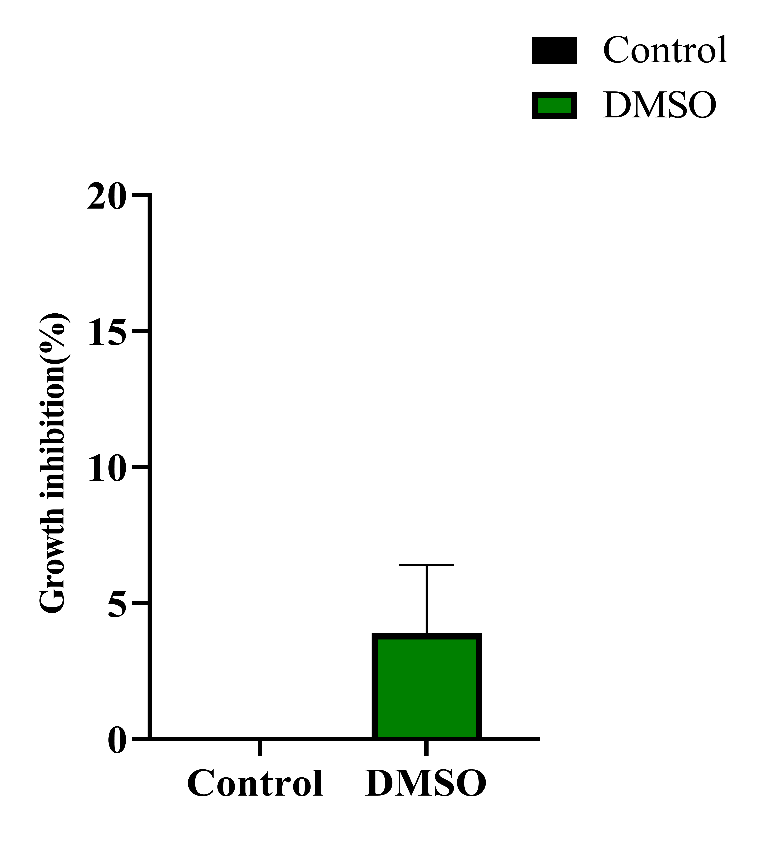


Fig S1. Growth inhibition of *Chaetoceros sp.* exposed to DMSO (0.1%)

**Fig. S2**

**
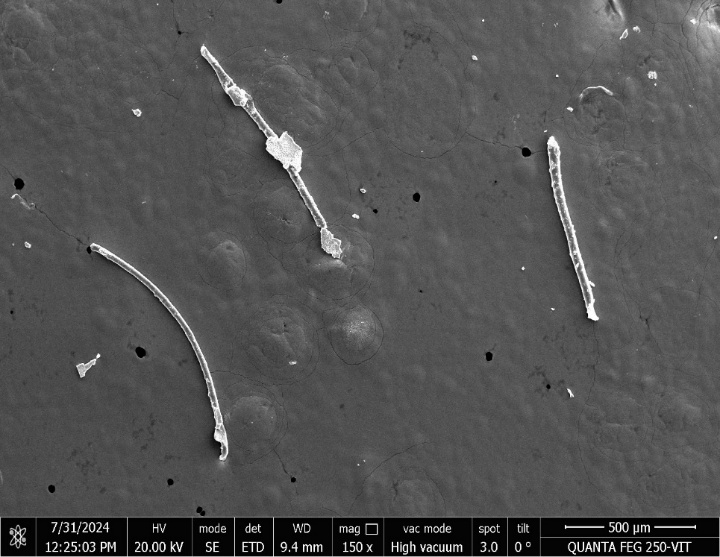
**

Fig S2. FE-SEM image of MFs

**Fig. S3**


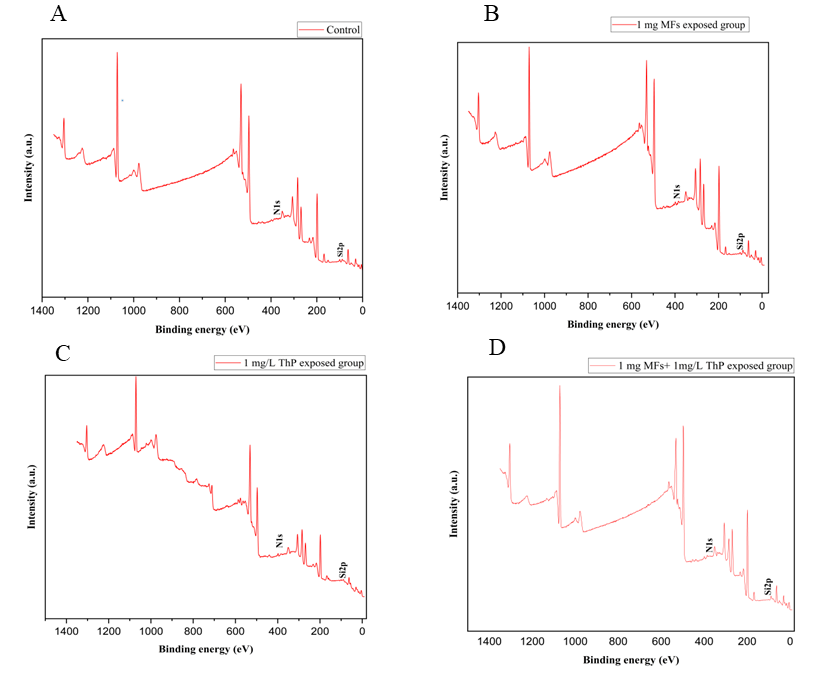


Fig S3. XPS spectra of Si2p: A) Control group; B) 1 mg/L ThP exposed groups; C) 1 mg MFs exposed group; D) Combination of 1 mg/L ThP and 1 mg MFs exposed group

**Fig. S4**


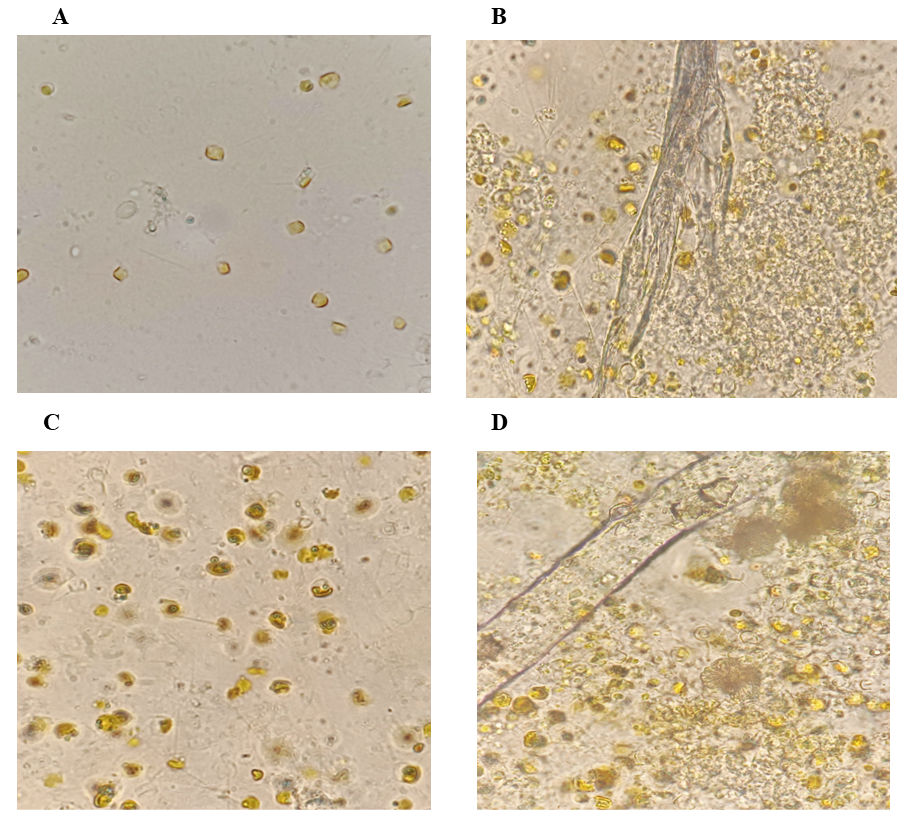


Fig. S4 Optical microscopic images of *Chaetoceros* sp.; A) Control, B) *Chaetoceros* sp. exposed to 1 mg MFs, C) *Chaetoceros* sp. exposed to 1 mg/L ThP, D) *Chaetoceros* sp. exposed to 1 mg MFs + 1 mg/L ThP

**Methods**

**Chemicals used**

Diatom growth media (f/2 media) and sodium silicate were purchased from Hi-Media Pvt. Ltd, Mumbai, India. MTT (3- [4, 5- dimethylthiazol- 2-yl] − 2, 5-diphenyltetrazolium bromide), trichloroacetic acid (TCA), and thiobarbituric acid (TBA) were also acquired from Hi-Media Pvt. Ltd, Mumbai, India. 2′, 7′-dichlorofluorescein diacetate (DCFH-DA), ammonium molybdate tetrahydrate, oxalic acid, 4-methylamino phenol sulfate, and anhydrous sodium sulfite were obtained from Sigma-Aldrich in Missouri, USA. Other chemicals, such as 5, 5′-dithiobis (2-nitrobenzoic acid) and acetylthiocholine iodide, were offered by Hi-Media Pvt. Ltd., India

**Method S1: Ultra-Performance Liquid Chromatography**

The Ultra-Performance Liquid Chromatography (UPLC system, Waters Inc., Bedford, MA, US) technique was used to estimate the initial and final measured concentration of ThP upon exposure to MFs. This was carried out in abiotic conditions without diatom cells. The mobile phase was 0.1% formic acid in water (A) and methanol (B). An ACQUITY UPLC BEH C18 column (2.1 mm × 100 mm, 1.7 μm, Waters) was chosen to separate the target compounds. The injection volume was 10 mL with a flow rate of 0.2 mL/min, and the column was maintained at 40 . The total run time was set for 20 min (Debroy et al., 2024).

**Method S2: Changes in the surface chemical composition of the diatom**

X-ray photoelectron spectroscopy (XPS) was performed for these test groups to analyse the surface chemical composition of diatom, specifically to determine the atomic percentage of Si and its ratio with N. Following the 72 h interaction, the diatom samples were centrifuged, and the pellets were washed with ASW and subsequently freeze-dried (Chen et al., 2023). The dried samples were placed on an aluminum platform, and the characterization was carried out with an aluminum Kα-source at a power of 300 W. The X-ray focal spot on the sample was about 1 mm2, and the photoelectron signals were observed at 53◦ take-off angle with a depth of 100 Å.XPS analysis was performed in Thermo Scientific™ ESCALAB™ Xi+ at Central Laboratory for Instrumentation and Facilitation (CLIF), University of Kerala, Kariavattom Campus.

For the quantification of dissolved silica, the samples were centrifuged at 7000rpm for 10 min, and the supernatant was collected. The dissolved silica was estimated by the silicomolybdic acid spectrophotometric method. 1mL of the sample is diluted with ultrapure water and mixed with solution A (20 g/L ammonium molybdate tetrahydrate and 60 ml/L concentrated hydrochloric acid in ultrapure water). After 10 minutes, 7.5 mL of solution B (oxalic acid (20 g), 4-methylamino phenol sulfate (6.67 g), anhydrous sodium sulfite (4 g), deionized water (500 mL), and concentrated sulphuric acid (100 mL) in a 1 L volumetric flask and completed with ultrapure water) is added. The blue color is left to develop for over 2 hours at room temperature before measuring the optical density at λ = 810 nm (Coradin et al., 2004).

**Method S3: Evaluation of growth inhibition**

The cell viability of diatoms was assessed using the MTT assay. A freshly prepared dye solution at 5 mg/ml concentration was made using PBS buffer (pH 7.4). After 72h exposure to MFs, ThP, and their combination, 500 μl of cell suspension was collected, and 20 μl of the MTT dye was added. The mixture was then incubated in the dark for 4 h. After incubation, the samples were centrifuged at 8000 rpm. The cell pellet was resuspended in 200 μl of dimethyl sulfoxide. Absorbance was measured at 570 nm using the microplate absorbance spectrophotometer (BIO-RAD) (Giri and Mukherjee, 2021).

**Method S4: Accumulation of ThP**

The accumulation of ThP by the diatom was quantified by centrifuging the samples at 7000 rpm for 10min. The pellets were collected and homogenized with 5 mL of methanol. After centrifugation, the supernatant is collected and concentrated, analyzed by LC-MS/MS to quantify ThP. A HPLC column Shim-pack GIST C18 column (5µm, 250 mm × 4.6mm, Waters) was chosen to separate the target compounds. The injection volume was 10 µL with a flow rate of 0.8 mL/min, and the column was maintained at 40 . The total run time was set for 20 min (Mei et al., 2025)**.**

**Method S5: Assessment of the photosynthetic activity of diatoms**

The concentrations of photosynthetic pigments (chlorophyll a and carotenoids) were measured spectrophotometrically, with 95% ethanol serving as the reference. The diatom suspension was centrifuged at 4000 rpm for 15 minutes. The collected pellet was then mixed with 3 ml of 95% ethanol. After vortexing the mixture, it was centrifuged again for 3 minutes at 4000 rpm. The absorbance of the resulting supernatant was measured at 665, 649, and 470 nm, and the pigment concentrations were determined (Rex M and Mukherjee, 2023).

A photosynthesis yield analyzer (Mini PAM, Walz) was employed to assess the photochemical quantum yield of the PS II system (Fv/Fm) and the relative electron transport rate (rETR) in both control and test samples. After 72 h of interaction, the samples were centrifuged at 7000 rpm (10 minutes), and the resulting pellets were resuspended in artificial seawater. Subsequently, 200 µL of the samples were incubated in the dark for 30 minutes, placed in the instrument chamber, and exposed to high-intensity actinic light to measure the effective quantum yield of PS II (Fv/Fm) and the relative electron transport rate (Rex, M. et al., 2024).

**Method S6: Estimation of oxidative stress**

Dichlorodihydrofluorescein diacetate is a non-fluorescent, cell-permeable dye that, upon reacting with reactive oxygen species (ROS), is oxidized to the highly fluorescent compound 2’,7’-dichlorofluorescein, which can be detected. After 72 h, test samples were incubated with 100 µl of DCFH-DA (100 mM) in the dark for 30 minutes. The fluorescence intensity was measured in a 96-well plate at an excitation wavelength of 485 nm and an emission wavelength of 530 nm using a spectrofluorometer (Mandal et al., 2025).

To determine MDA levels, following a 72h interaction period, the samples were centrifuged at 7000 rpm for 10 minutes at 4°C. The collected cell pellets were subsequently treated with 0.25% TBA (prepared in a 10% TCA solution) and heated in a water bath at 95°C for 30 minutes. After heating, the reaction was stopped by rapidly cooling the samples on ice, followed by another centrifugation at 7000 rpm for 10 minutes. The absorbance of the supernatant, which contained the released MDA, was measured at 530 nm, with the absorbance at 600 nm subtracted to account for background interference (Rex, C. et al., 2024).

**Method S7: Accumulation of Triphenyl phosphate by *Artemia salina***

ThP accumulation by *Artemia salina* fed with diatom pre-treated with ThP and the combination of ThP with MFs were analysed by LC-MS. After incubation, the samples were collected and homogenised with methanol. Followed by centrifugation, the supernatants were subjected to LC-MS analysis. A HPLC column Shim-pack GIST C18 column (5µm, 250 mm × 4.6mm, Waters) was chosen to separate the target compounds. The injection volume was 10 µL with a flow rate of 0.8 mL/min, and the column was maintained at 40 . The total run time was set for 20 min (Mei et al., 2025)**.**

**Method S8: Abbotts modelling**

The type of interaction occurring between MFs and ThP when present together as a mixture was determined. Based on the toxicities produced by pristine MFs and ThP, the expected toxicity (CExp) of the mixture was estimated using equation (1)

1. CExp= M+T – (N*T/100)

Where M and T denote the toxicity of pristine MFs and ThP, respectively. Then, the inhibition ratio (RI) was calculated using equation (2)

(2) RI = CObs / Cexp

Where, CObs denote the observed toxicity of the mixture, MFs, and ThP. The kind of interaction between MFs and ThP was decided based on the inhibition ratio. If the inhibition ratio is less than 1, then the interaction is stated as antagonistic. If the inhibition ratio is 1, then the interaction nature is called additive. Whereas if the inhibition ratio exceeds 1, the interaction between the two contaminants is said to be synergistic. Statistical analysis is performed by comparing the observed and the expected toxicity using Two-way ANOVA. Regardless of the RI value obtained, the kind of interaction between the contaminants is called additive if no significant difference exists between the observed and the expected toxicity (Thiagarajan et al., 2019).

**Method S9: Integrated biomarker responses (IBR)**

Integrated biomarker responses (IBR) values were calculated as per (Ma et al., 2025),

Standardization of data (Y) using the following formula


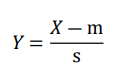


X, Value of biomarker

M, Mean of all biomarkers

S, Standard deviation across the biomarker

Calculation of biomarker score, S

S = Y + |Ymin| (S≥0)

Activated biomarker = Y and Inhibited biomarker = -Y

The IBR was calculated using the following formula


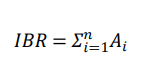


Ai can be calculated as,


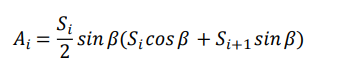


Where β is,


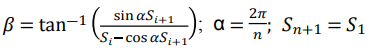


n, Total number of biomarkers (Ma et al., 2025).

**References**

Chen, F., Zhang, Z., Li, Y., Jiang, H., Zhou, Y., Liu, H., Pan, K., Ma, J., 2023. Impact of facemask debris on marine diatoms: Physiology, surface properties, sinking rate, and copepod ingestion. Science of The Total Environment 905, 167222.

Coradin, T., Eglin, D., Livage, J., 2004. The silicomolybdic acid spectrophotometric method and its application to silicate/biopolymer interaction studies. Journal of Spectroscopy 18(4), 567-576.

Debroy, A., Saravanan, J.S., Nirmala, M.J., Pulimi, M., Mukherjee, A., 2024. Algal EPS modifies the toxicity potential of the mixture of polystyrene nanoplastics (PSNPs) and triphenyl phosphate in freshwater microalgae Chlorella sp. Chemosphere 366, 143471.

Giri, S., Mukherjee, A., 2021. Ageing with algal EPS reduces the toxic effects of polystyrene nanoplastics in freshwater microalgae Scenedesmus obliquus. Journal of Environmental Chemical Engineering 9(5), 105978.

Ma, Y., Liu, L., Xu, Y., Feng, J., Wang, C., Liu, B., Lin, P., Yin, H., Sun, L., Li, P., 2025. Aggravated Visual Toxicity of Eco-Corona on Micro (Nano) Plastics in Marine Medaka (Oryzias melastigma). Environmental Science & Technology Letters 12(5), 510-517.

Mandal, S., Rex M, C., Bhattacharya, B., Poddar, B., Chandrsekaran, N., Mukherjee, A., 2025. Comprehensive toxicity assessment of selected pharmaceuticals (ciprofloxacin, amoxicillin, and levofloxacin) on freshwater microalgae Scenedesmus obliquus: effect of media composition. Environmental Pollutants and Bioavailability 37(1), 2463538.

Mei, M., Deng, L., Lin, Z., Ai, F., Yin, Y., Guo, H., 2025. Effects of Triphenyl phosphate (TPHP) on Microcystis aeruginosa: Growth stimulation and adaptability mechanisms. Journal of Hazardous Materials, 139238.

Rex, C., Poddar, B., Das, S., Mukherjee, A., 2024. Interactive effects of selected pharmaceutical products (metronidazole, diclofenac, ibuprofen) and differently functionalized nanoplastics on marine algae Chlorella sp.

Rex M, C., Mukherjee, A., 2023. The comparative effects of visible light and UV-A radiation on the combined toxicity of P25 TiO2 nanoparticles and polystyrene microplastics on Chlorella sp. Environmental Science and Pollution Research 30(58), 122700-122716.

Rex, M., Debroy, A., Mukherjee, A., 2024. The impact of nTiO 2 and GO (graphene oxide), and their combinations, on freshwater Chlorella sp.: a comparative study in lake water and BG-11 media. Environmental science. Processes & Impacts.

Thiagarajan, V., Natarajan, L., Seenivasan, R., Chandrasekaran, N., Mukherjee, A., 2019. Tetracycline affects the toxicity of P25 n-TiO2 towards marine microalgae Chlorella sp. Environmental research 179, 108808.
